# Supplementary material
Source: PubMed Central journal article supplement (PMC4056649)
Supplement: jn.113.188714_nutrition188714SupplementaryData1.pdf [file jn.113.188714_nutrition188714SupplementaryData1.pdf]

**Supplementary Table 1. Factor analysis<sup>1</sup> of beliefs and attitudes related to infant feeding and maternal self-efficacy**

| Beliefs and attitudes                                                                                                         | Factor loadings |              |              |              |
|-------------------------------------------------------------------------------------------------------------------------------|-----------------|--------------|--------------|--------------|
|                                                                                                                               | Factor 1        | Factor 2     | Factor 3     | Factor 4     |
| <b>Factor 1: Belief in sufficiency of EBF (Cronbach's alpha=0.803; Variation explained=38.2%)</b>                             |                 |              |              |              |
| A baby cannot survive on breast milk alone for the first six months                                                           | <b>0.589</b>    | -0.036       | 0.027        | -0.000       |
| When I see a baby breastfeeding often, I think that the baby is hungry and should be fed other foods                          | <b>0.597</b>    | 0.050        | 0.010        | 0.085        |
| A mother cannot produce enough milk to provide for her baby in the first six months                                           | <b>0.668</b>    | 0.014        | -0.019       | -0.130       |
| It's okay for a baby to have a few sips of water here and there, in the first six months                                      | <b>0.417</b>    | -0.144       | 0.177        | 0.274        |
| Giving other foods in the first six months will make a baby grow up to be strong                                              | <b>0.534</b>    | -0.040       | 0.315        | 0.040        |
| Giving breast milk alone to an infant for the first 6 months is cruel                                                         | <b>0.353</b>    | 0.109        | 0.064        | 0.065        |
| If my baby has a sunken or non-pulsating fontanel ( <i>nhova</i> ), I would give it traditional medicine                      | <b>0.534</b>    | -0.030       | -0.063       | -0.052       |
| When my baby is sick, I want to feed it other foods and liquids in addition to breast milk                                    | <b>0.618</b>    | -0.001       | 0.002        | 0.057        |
| <b>Factor 2: Maternal self-efficacy regarding infant feeding and care (Cronbach's alpha=0.804; Variation explained=37.7%)</b> |                 |              |              |              |
| When my baby is breastfeeding, I can always recognize when my baby is full (R)                                                | 0.115           | <b>0.583</b> | -0.027       | -0.105       |
| I always feel comfortable breastfeeding with my family members present (R)                                                    | -0.206          | <b>0.305</b> | 0.175        | 0.141        |
| I can always manage to keep up with my baby's breastfeeding demands (R)                                                       | -0.038          | <b>0.673</b> | -0.018       | 0.048        |
| I can always ensure that my baby is getting enough breast milk (R)                                                            | 0.001           | <b>0.757</b> | 0.029        | 0.048        |
| I am always motivated to breastfeed my baby (R)                                                                               | -0.050          | <b>0.687</b> | -0.082       | 0.007        |
| I am satisfied with the amount of time that I have available in a day to breastfeed my baby (R)                               | -0.011          | <b>0.656</b> | 0.121        | 0.100        |
| I am satisfied with the amount of time that I have available in a day to take care of my baby (R)                             | -0.007          | <b>0.827</b> | -0.065       | -0.004       |
| <b>Factor 3: Enabling environment for EBF (Cronbach's alpha=0.571; Variation explained=25.8%)</b>                             |                 |              |              |              |
| In my family, giving only breast milk for the first six months is achievable (R)                                              | 0.062           | -0.045       | <b>0.699</b> | -0.033       |
| In my family, giving only breast milk for the first six months is acceptable (R)                                              | 0.077           | -0.013       | <b>0.708</b> | -0.082       |
| In my family, a woman can make decisions about infant feeding by herself. (R)                                                 | -0.232          | -0.067       | <b>0.298</b> | -0.014       |
| I can always feed my baby with breast milk only (R)                                                                           | 0.258           | 0.249        | <b>0.365</b> | 0.097        |
| <b>Factor 4: Beliefs about cooking oil use in the first six months (Cronbach's alpha=0.812; Variation explained=24.9%)</b>    |                 |              |              |              |
| Giving cooking oil can be helpful in the first 6 months.                                                                      | 0.030           | 0.007        | 0.021        | <b>0.786</b> |
| I would use cooking oil to settle tummy problems ( <i>ruzoka</i> )                                                            | 0.112           | -0.015       | -0.141       | <b>0.775</b> |
| <b>Item that did not meet criteria for factor inclusion</b>                                                                   |                 |              |              |              |
| I worry about all the things that I have to get done in a day.                                                                | 0.267           | 0.069        | -0.127       | 0.017        |

<sup>1</sup> Extraction method: Principal Axis Factoring; Rotation method: Oblique promax. (R) indicates that the item was reverse coded

Supplementary Table 2. Factor Analysis<sup>1</sup> of beliefs and attitudes related to social norms

| Beliefs and attitudes                                                                                                                               | Factor loadings |              |              |          |          |
|-----------------------------------------------------------------------------------------------------------------------------------------------------|-----------------|--------------|--------------|----------|----------|
|                                                                                                                                                     | Factor 1        | Factor 2     | Factor 3     | Factor 4 | Factor 5 |
| <b>Factor 1: Community expectations regarding infant feeding and traditional medicine (Cronbach's alpha=0.852; Variation explained=24.2%)</b>       |                 |              |              |          |          |
| At this time, my mother will think I am lazy if I don't prepare porridge for my baby*                                                               | <b>0.347</b>    | 0.112        | 0.394        | -0.005   | 0.106    |
| Other family members think my baby would be bigger if I fed him/her solid foods.                                                                    | <b>0.706</b>    | 0.134        | 0.124        | -0.165   | -0.224   |
| Other family members think I should use oral traditional medicines to help my baby.                                                                 | <b>0.623</b>    | -0.265       | -0.034       | 0.233    | 0.031    |
| At this time, other family members will think I am lazy if I don't prepare porridge for my baby.                                                    | <b>0.742</b>    | -0.170       | 0.241        | 0.078    | -0.091   |
| I feel pressured to feed my baby the way other family members tell me.*                                                                             | <b>0.375</b>    | 0.224        | -0.158       | 0.326    | -0.004   |
| Elders in the community think my baby would be bigger if I fed him/her solid foods.                                                                 | <b>0.825</b>    | 0.003        | -0.008       | -0.034   | -0.227   |
| Elders in the community think I should use oral traditional medicines to help my baby.                                                              | <b>0.678</b>    | -0.053       | -0.097       | 0.110    | 0.040    |
| At this time, elders in the community will think I am lazy if I don't prepare porridge for my baby.                                                 | <b>0.934</b>    | -0.089       | 0.079        | -0.246   | -0.158   |
| I feel pressured to feed my baby the way elders in the community tell me.*                                                                          | <b>0.513</b>    | 0.340        | -0.131       | 0.012    | 0.080    |
| My peers/friends influence how I feed my baby.*                                                                                                     | <b>0.330</b>    | 0.468        | 0.097        | 0.024    | -0.231   |
| At this time, my peers/friends will think I am lazy if I don't prepare porridge for my baby.                                                        | <b>0.555</b>    | 0.077        | 0.127        | 0.076    | 0.089    |
| <b>Factor 2: Maternal autonomy regarding infant feeding decisions (Cronbach's alpha=0.858; Variation explained=22.3%)</b>                           |                 |              |              |          |          |
| I always feed my baby the way my husband/partner tell me.                                                                                           | -0.117          | <b>0.652</b> | -0.130       | 0.192    | -0.070   |
| My mother influences how I feed my baby                                                                                                             | -0.020          | <b>0.625</b> | 0.079        | 0.087    | -0.148   |
| I always feed my baby the way my mother tells me.                                                                                                   | -0.073          | <b>0.728</b> | -0.018       | -0.056   | 0.063    |
| My mother-in-law influences how I feed my baby.                                                                                                     | 0.034           | <b>0.665</b> | 0.134        | -0.171   | -0.229   |
| I always feed my baby the way my mother-in-law tells me.                                                                                            | -0.048          | <b>0.926</b> | -0.090       | -0.103   | 0.080    |
| I always feed my baby the way other family members tell me.                                                                                         | -0.145          | <b>0.793</b> | 0.168        | -0.055   | 0.163    |
| I feel pressured to feed my baby the way elders in the community tell me.*                                                                          | 0.513           | <b>0.340</b> | -0.131       | 0.012    | 0.080    |
| I always feed my baby the way elders in the community tell me.                                                                                      | 0.053           | <b>0.498</b> | 0.083        | 0.085    | 0.277    |
| My peers/friends influence how I feed my baby.*                                                                                                     | 0.330           | <b>0.468</b> | 0.097        | 0.024    | -0.231   |
| I always feed my baby the way my peers/friends tell me.                                                                                             | 0.059           | <b>0.442</b> | 0.112        | 0.285    | 0.075    |
| <b>Factor 3: Expectations of partners, mothers, and mothers in-law regarding infant feeding (Cronbach's alpha=0.893; Variation explained=20.1%)</b> |                 |              |              |          |          |
| My husband/partner wants me to give other foods to my baby in addition to breast milk.                                                              | 0.005           | 0.072        | <b>0.634</b> | -0.006   | 0.141    |
| My husband/partner wants me to give other liquids (including water) to my baby in addition to breast milk.                                          | -0.009          | 0.155        | <b>0.646</b> | -0.082   | 0.014    |
| My husband/partner wants me to give only breast milk to my baby. (R)                                                                                | -0.013          | -0.176       | <b>0.650</b> | -0.146   | 0.241    |
| My mother wants me to give other foods to my baby in addition to breast milk.                                                                       | 0.081           | 0.142        | <b>0.617</b> | 0.237    | 0.026    |

## ONLINE SUPPORTING MATERIAL

|                                                                                                                                               |        |        |              |              |              |
|-----------------------------------------------------------------------------------------------------------------------------------------------|--------|--------|--------------|--------------|--------------|
| My mother wants me to give other liquids (including water) to my baby in addition to breast milk.                                             | 0.010  | 0.162  | <b>0.705</b> | 0.164        | -0.043       |
| At this time, my mother will think I am lazy if I don't prepare porridge for my baby*                                                         | 0.347  | 0.112  | <b>0.394</b> | -0.005       | 0.106        |
| My mother wants me to give only breast milk to my baby. (R)                                                                                   | 0.094  | -0.209 | <b>0.634</b> | -0.150       | 0.162        |
| My mother-in-law wants me to give other foods to my baby in addition to breast milk.                                                          | -0.067 | 0.107  | <b>0.710</b> | 0.200        | -0.178       |
| My mother-in-law wants me to give other liquids (including water) to my baby in addition to breast milk                                       | 0.030  | 0.094  | <b>0.682</b> | 0.142        | -0.214       |
| At this time, my mother-in-law will think I am lazy if I don't prepare porridge for my baby.                                                  | 0.294  | 0.088  | <b>0.375</b> | 0.178        | 0.141        |
| My mother-in-law wants me to give only breast milk to my baby. (R)                                                                            | 0.155  | -0.285 | <b>0.691</b> | -0.116       | 0.130        |
| <b>Factor 4: Perceived pressure regarding infant feeding and traditional medicine use (Cronbach's alpha=0.740; Variation explained=19.5%)</b> |        |        |              |              |              |
| I feel pressured to feed my baby the way my husband/partner tells me.                                                                         | -0.229 | -0.087 | 0.128        | <b>0.822</b> | -0.157       |
| My mother encourages me to use oral traditional medicines for my baby.                                                                        | 0.131  | 0.073  | -0.002       | <b>0.446</b> | 0.236        |
| I feel pressured to feed my baby the way my mother tells me.                                                                                  | -0.053 | 0.240  | 0.095        | <b>0.536</b> | -0.043       |
| My mother-in-law encourages me to use oral traditional medicines for my baby.                                                                 | 0.273  | -0.259 | 0.036        | <b>0.543</b> | 0.124        |
| I feel pressured to feed my baby the way my mother-in-law tells me.                                                                           | 0.003  | 0.140  | 0.071        | <b>0.573</b> | 0.008        |
| I feel pressured to feed my baby the way other family members tell me.*                                                                       | 0.375  | 0.224  | -0.158       | <b>0.326</b> | -0.004       |
| My peers/friends encourage me to use oral traditional medicines for my baby.                                                                  | 0.262  | -0.029 | -0.105       | <b>0.493</b> | 0.267        |
| I feel pressured to feed my baby the way peers/friends tell me.                                                                               | 0.260  | 0.229  | -0.142       | <b>0.396</b> | 0.128        |
| I feel pressured to feed my baby the way health workers at the facility tell me.                                                              | -0.206 | -0.390 | 0.167        | <b>0.578</b> | -0.351       |
| <b>Factor 5: Health worker involvement in maternal infant feeding decisions (Cronbach's alpha=0.484; Variation explained=8.7%)</b>            |        |        |              |              |              |
| Health workers at the facility influence how I feed my baby. (R)                                                                              | -0.239 | -0.051 | 0.052        | -0.123       | <b>0.608</b> |
| Health workers at the facility would approve of me giving my baby oral traditional medicine.                                                  | -0.030 | 0.026  | -0.063       | 0.307        | <b>0.567</b> |
| Health workers at the facility always recommend that I only give breast milk to my baby for the first six months. (R)                         | -0.269 | 0.021  | 0.125        | 0.186        | <b>0.447</b> |
| I always feed my baby the way health workers at the facility tell me. (R)                                                                     | -0.218 | 0.109  | 0.230        | -0.161       | <b>0.575</b> |
| <b>Items that did not meet criteria for factor inclusion</b>                                                                                  |        |        |              |              |              |
| My husband/partner influences how I feed my baby.                                                                                             | -0.210 | 0.195  | 0.132        | -0.118       | -0.221       |

<sup>1</sup> Extraction method: Principal Axis Factoring; Rotation method: Oblique promax. (R) indicates that the item was reverse coded

\* Items cross loaded and included in two factors

Supplementary Table 3. Reasons for first non-breastmilk feeds

| Infant Age   | # infants receiving first non-Breast milk food | # first non-breastmilk food for PROTECTION <sup>a</sup> |             |              |                          | # first non-breast milk food for NUTRITION <sup>b</sup> |          |        |                         | # first non-breast milk food for CRYING |                                   |       |            |       |        |                      |
|--------------|------------------------------------------------|---------------------------------------------------------|-------------|--------------|--------------------------|---------------------------------------------------------|----------|--------|-------------------------|-----------------------------------------|-----------------------------------|-------|------------|-------|--------|----------------------|
|              |                                                | Water (include Gripe water)                             | Cooking Oil | All Medicine | TOTAL fed for PROTECTION | Water Include sugar water                               | Porridge | Yogurt | Total fed for NUTRITION | Cooking Oil                             | Porridge (includes sour porridge) | Water | Vegetables | Fruit | Yogurt | Total fed for CRYING |
| Birth – 1 mo | 144                                            | 12                                                      | 99          | 8            | 119                      | 6                                                       | 4        | 0      | 10                      | 3                                       | 1                                 | 2     | 0          | 0     | 0      | 6                    |
| 1-2 mo       | 37                                             | 2                                                       | 20          | 1            | 23                       | 3                                                       | 1        | 1      | 5                       | 2                                       | 2                                 | 0     | 0          | 0     | 4      |                      |
| 2-3 mo       | 23                                             | 2                                                       | 11          | 2            | 15                       | 3                                                       | 3        | 0      | 6                       | 0                                       | 0                                 | 1     | 0          | 0     | 1      |                      |
| 3-4 mo       | 11                                             | 1                                                       | 1           | 2            | 4                        | 0                                                       | 2        | 0      | 2                       | 0                                       | 2                                 | 0     | 1          | 0     | 4      |                      |
| 4-5 mo       | 3                                              | 0                                                       | 2           | 0            | 2                        | 0                                                       | 1        | 0      | 1                       | 0                                       | 0                                 | 0     | 0          | 0     | 0      |                      |
| Unknown      | 11                                             | 1                                                       | 3           | 0            | 4                        | 0                                                       | 0        | 0      | 0                       | 1                                       | 0                                 | 0     | 0          | 1     | 2      |                      |
| Total        | 229                                            | 18                                                      | 136         | 13           | 167                      | 12                                                      | 11       | 1      | 24                      | 6                                       | 5                                 | 3     | 1          | 1     | 17     |                      |

<sup>a</sup>The following reasons for feeding were classified as “Protection feedings:” concern about fontanelle, stomach problems, take with pills, hiccups, constipation, and unspecified sickness.

<sup>b</sup>The following reasons for feeding were classified as “Nutrition Feedings:” baby was, restless, thirsty, dehydrated, not breastfeeding, or hungry,

ONLINE SUPPORTING MATERIAL

Supplementary Table 4. First Non-breast milk Feedings

| Age       | Food/liquid          | Protection |            | Nutrition |            | Crying |            | Other |            |
|-----------|----------------------|------------|------------|-----------|------------|--------|------------|-------|------------|
|           |                      | First      | Subsequent | First     | Subsequent | First  | Subsequent | First | Subsequent |
| birth-1mo | cooking oil          | 99         | 31         |           |            | 3      |            |       |            |
|           | formula              |            |            |           |            |        |            |       | 1          |
|           | porridge             |            |            | 4         | 3          | 1      | 6          |       | 1          |
|           | soup                 |            |            |           | 2          |        |            |       |            |
|           | sugar water          |            |            | 1         |            |        |            |       |            |
|           | traditional medicine | 8          | 6          |           |            |        |            |       |            |
|           | vegetables           |            |            |           |            |        | 1          |       | 1          |
|           | water                | 12         | 5          | 5         | 8          | 2      | 6          | 9     | 11         |
|           | yogurt               |            |            |           |            |        |            |       | 1          |
| 1-2mo     | cooking oil          | 20         | 10         |           |            | 2      |            |       |            |
|           | drinks               |            |            |           |            |        |            |       | 1          |
|           | eggs                 |            |            |           | 1          |        |            |       |            |
|           | fruit                |            |            |           | 2          |        | 1          |       | 3          |
|           | medicine             | 1          |            |           |            |        |            |       |            |
|           | milk                 |            |            |           | 2          |        |            |       |            |
|           | porridge             |            |            | 1         | 6          | 2      | 9          |       |            |
|           | soup                 |            |            |           | 1          |        | 1          |       | 2          |
|           | sour porridge        |            |            |           | 1          |        | 1          |       |            |
|           | stiff porridge       |            |            |           | 2          |        |            |       | 1          |
|           | sugar water          |            | 1          |           |            |        |            |       |            |
|           | tea                  |            |            |           |            |        |            |       | 1          |
|           | traditional medicine |            | 1          |           |            |        |            |       |            |
|           | water                | 2          | 2          | 3         | 5          |        | 2          | 5     | 11         |
|           | yogurt               |            |            | 1         |            |        | 1          |       | 1          |
| 2-3mo     | cooking oil          | 11         | 4          |           |            |        | 1          |       |            |
|           | formula              |            |            |           | 2          |        |            |       | 1          |
|           | fruit                |            |            |           | 4          |        |            |       | 2          |
|           | porridge             |            |            | 3         | 12         |        | 11         |       | 2          |
|           | soup                 |            |            |           |            |        |            |       | 4          |
|           | sour milk            |            |            |           | 1          |        |            |       |            |
|           | sour porridge        |            |            |           |            |        | 1          |       |            |
|           | stiff porridge       |            |            |           |            |        |            |       | 1          |
|           | traditional medicine | 2          | 1          |           |            |        |            |       |            |
|           | vegetables           |            |            |           |            |        |            |       | 1          |
|           | water                | 2          | 8          | 3         | 4          | 1      | 2          | 1     | 15         |
|           | yogurt               |            |            |           | 3          |        |            |       | 7          |
| 3-4mo     | cooking oil          | 1          | 3          |           |            |        |            |       |            |

## ONLINE SUPPORTING MATERIAL

| Age          | Food/liquid          | Protection |            | Nutrition |            | Crying    |            | Other     |            |
|--------------|----------------------|------------|------------|-----------|------------|-----------|------------|-----------|------------|
|              |                      | First      | Subsequent | First     | Subsequent | First     | Subsequent | First     | Subsequent |
|              | drinks               |            |            |           | 1          |           |            |           | 2          |
|              | eggs                 |            |            |           | 1          |           |            |           |            |
|              | fruit                |            |            |           | 5          |           |            |           | 3          |
|              | medicine             |            | 3          |           |            |           |            |           |            |
|              | porridge             |            |            | 2         | 8          | 1         | 8          | 1         | 1          |
|              | soup                 |            |            |           | 2          |           | 1          |           | 3          |
|              | sour milk            |            |            |           | 1          |           |            |           | 1          |
|              | sour porridge        |            |            |           | 1          | 1         | 2          |           | 3          |
|              | stiff porridge       |            |            |           |            |           | 1          |           | 2          |
|              | sugar water          |            |            |           | 1          |           |            |           |            |
|              | tea                  |            |            |           |            |           |            |           | 1          |
|              | traditional medicine | 2          | 2          |           |            |           |            |           |            |
|              | vegetables           |            |            |           | 1          | 1         | 2          |           | 2          |
|              | water                | 1          | 4          |           | 5          |           | 2          |           | 6          |
| yogurt       |                      |            |            |           | 1          | 1         |            | 4         |            |
| 4-5mo        | cooking oil          | 2          |            |           |            |           |            |           |            |
|              | eggs                 |            |            |           | 1          |           |            |           |            |
|              | fruit                |            |            |           | 1          |           |            |           |            |
|              | meat                 |            |            |           |            |           |            |           | 1          |
|              | medicine             |            | 1          |           |            |           |            |           |            |
|              | milk                 |            |            |           | 1          |           |            |           |            |
|              | porridge             |            |            | 1         | 2          |           |            |           |            |
|              | soup                 |            |            |           | 1          |           |            |           | 2          |
|              | sour milk            |            |            |           | 1          |           |            |           |            |
|              | sour porridge        |            |            |           | 2          |           |            |           |            |
|              | stiff porridge       |            |            |           | 1          |           | 2          |           |            |
|              | tea                  |            |            |           |            |           |            |           | 1          |
|              | vegetables           |            |            |           |            |           | 1          |           |            |
|              | water                |            |            |           | 2          |           |            |           | 4          |
|              | yogurt               |            |            |           |            |           |            |           | 1          |
| Un-known     | cooking oil          | 3          |            |           |            | 1         |            |           |            |
|              | fruit                |            |            |           |            | 1         |            |           |            |
|              | medicine             |            | 1          |           |            |           |            |           |            |
|              | soup                 |            |            |           | 1          |           |            |           |            |
|              | stiff porridge       |            |            |           | 1          |           |            |           |            |
|              | water                | 1          |            |           |            |           |            |           | 1          |
|              | unknown              |            |            |           |            |           |            | 5         |            |
| <b>Total</b> |                      | <b>167</b> | <b>83</b>  | <b>24</b> | <b>99</b>  | <b>17</b> | <b>63</b>  | <b>21</b> | <b>106</b> |
